# Supplementary material for: Added Value of Viscoelasticity for MRI-Based Prediction of Ki-67 Expression of Hepatocellular Carcinoma Using a Deep Learning Combined Radiomics (DLCR) Model
Source: MDPI journal article supplement (doi:10.3390/cancers14112575), 2022-05-24
Supplement: s1 [file s1]

# Supplementary Material: Ki-67 Expression of Hepatocellular Carcinoma Using a Deep Learning Combined Radiomics (DLCR) Model

Xumei Hu, Jiahao Zhou, Yan Li, Yikun Wang, Jing Guo, Ingolf Sack, Weibo Chen, Fuhua Yan, Ruokun Li and Chengyan Wang

**Table S1.** Scan parameter of the multi-parametric MRI.

| Variable             | Siemens   |           |           |            |           | Philips   |           |           |           |           |
|----------------------|-----------|-----------|-----------|------------|-----------|-----------|-----------|-----------|-----------|-----------|
|                      | T2w       |           | DWI       | DCE        |           | T2w       | DWI       |           | DCE       |           |
|                      | Axial     | Coronal   | Axial     | Axial      | Coronal   | Axial     | Coronal   | Axial     | Axial     | Coronal   |
| TR (ms)              | 3000      | 1200      | 6600      | 4.85       | 3.90      | 2000      | 1100      | 1520      | 3.7       | 5.2       |
| TE (ms)              | 95        | 91        | 62        | 2.41       | 1.49      | 66        | 80        | 70        | 1.32      | 1.07      |
| Flip angle (degrees) | 140       | 180       | 180       | 10         | 10        | 90        | 90        | 90        | 10        | 10        |
| Field of view (mm)   | 380 × 380 | 380 × 380 | 380 × 306 | 380 × 3093 | 360 × 360 | 360 × 360 | 450 × 450 | 327 × 399 | 400 × 352 | 380 × 380 |
| Matrix               | 320 × 320 | 256 × 256 | 134 × 134 | 20 × 240   | 320 × 234 | 288 × 288 | 320 × 282 | 108 × 128 | 268 × 234 | 212 × 212 |
| Slice thickness (mm) | 5         | 6         | 5         | 3          | 3         | 5         | 5         | 5         | 4         | 4.4       |

DWI = diffusion-weighted imaging; DCE = dynamic contrast-enhanced image.

**Table S2.** Parameter of the CNN networks.

| Variable         | Input Size | Layers | Conv Layers | Parameter Count |
|------------------|------------|--------|-------------|-----------------|
| Inception-Resnet | 299 × 299  | -      | -           | 60M             |
| Inception        | 299 × 299  | -      | -           | 23.2M           |
| Resnet           | 224 × 224  | 50     | 49          | 25.6M           |
| Xception         | 299 × 299  | -      | 36          | 22.8M           |
| VGG16            | 224 × 224  | 16     | 13          | >500M           |
| VGG19            | 224 × 224  | 19     | 16          | >500M           |

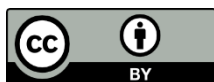

© 2022 by the authors. Licensee MDPI, Basel, Switzerland. This article is an open access article distributed under the terms and conditions of the Creative Commons Attribution (CC BY) license (<http://creativecommons.org/licenses/by/4.0/>).
